# Supplementary material for: A critical role for pannexin-1 in activation of innate immune cells of the choroid plexus
Source: PubMed Central journal article supplement — Channels (Austin). 2014 Jan 13;8(2):131–41. doi: 10.4161/chan.27653 (PMC4048302; doi:10.4161/chan.27653), 2014-01-13
Supplement: chan-8-131-s02.pdf [file chan-8-131-s02.pdf]

## **Supplemental Material to:**

**Valentyna Maslieieva and Roger J Thompson\***

**A critical role for pannexin-1 in activation of innate  
immune cells of the choroid plexus**

**March/April 2014; Vol 8 (Issue 2)**

**<http://dx.doi.org/10.4161/chan.27653>**

**<http://www.landesbioscience.com/journals/channels/article/27653/>**

1            **Movie 1.** Motility of epiplexus cells in control conditions. Scale bar is 50  $\mu\text{m}$ ,  
2 duration is 2 h.

3            **Movie 2.** Extracellular ATP triggers chemokinesis of epiplexus cells. Scale bar  
4 is 50  $\mu\text{m}$ , duration is 2 h.

5
